# Supplementary material for: Effect of molecular chirality on the collagen self-assembly
Source: Royal Society of Chemistry journal article supplement (doi:10.1039/d1nj02242c), 2021-01-01
Supplement: d1nj02242c1.pdf [file d1nj02242c1.pdf]

# Supporting Information

## Effect of molecular chirality on the collagen self-assembly

Weizhe Zhu<sup>a</sup>, Ke Li<sup>a</sup>, Qi Liu<sup>b</sup>, Huaying Zhong<sup>a</sup>, Chengzhi Xu<sup>a</sup>, Juntao Zhang<sup>a</sup>, Huizhi Kou<sup>a</sup>, Benmei Wei<sup>\*a</sup> and Haibo Wang<sup>\*a</sup>

<sup>a</sup> School of Chemical and Environmental Engineering, Wuhan Polytechnic University, Wuhan 430023, P. R. China

<sup>b</sup> School of Food Science and Engineering, Wuhan Polytechnic University, Wuhan 430023, P. R. China

\*To whom correspondence should be addressed: [benmeiwei@whpu.edu.cn](mailto:benmeiwei@whpu.edu.cn) (Benmei Wei); [wanghaibo@whpu.edu.cn](mailto:wanghaibo@whpu.edu.cn) (Haibo Wang).

## 1. SDS-PAGE of BATC

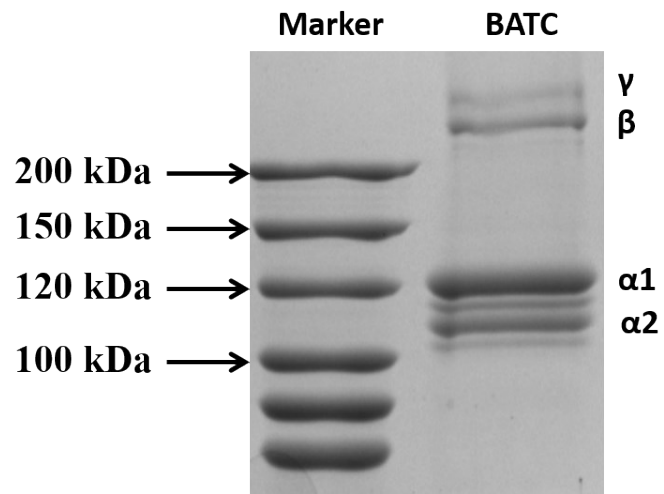

**Figure S1.** SDS-PAGE of Marker and BATC.

## 2. CD spectrum of BATC

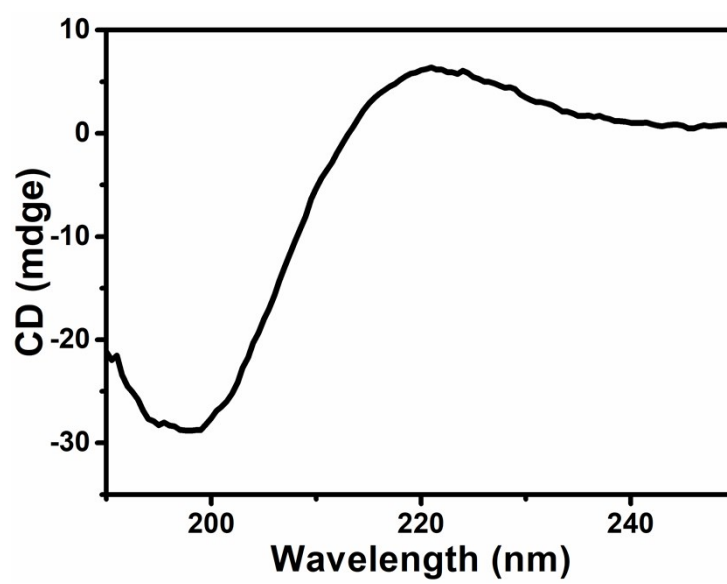

Figure S2. CD spectrum of BATC.

### 3. Turbidity-time curves of BATC self-assembly in the presence of L/D-GA

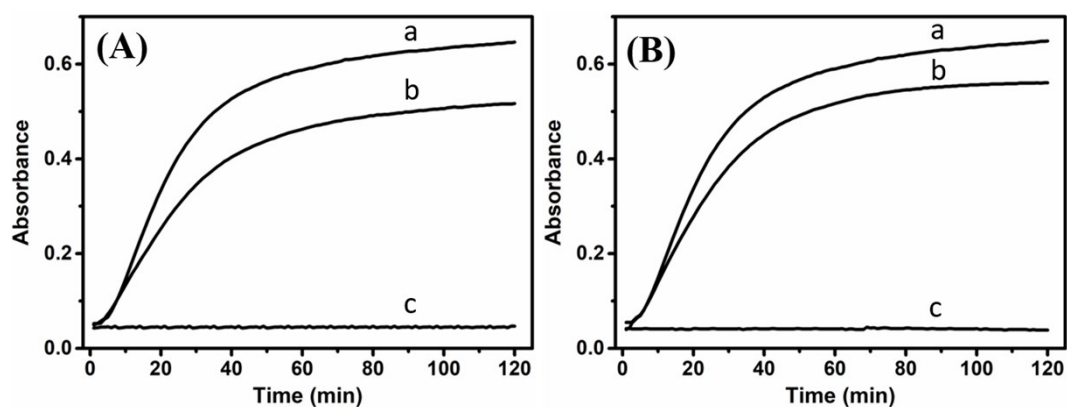

**Figure S3.** Turbidity-time curves of BATC self-assembly in the presence of different concentrations of L-GA (A) and D-GA (B). (a) 0 M, (b) 0.01 M, (c) 0.05 M.

#### 4. Calculation the self-assembly rate constant ( $k$ )

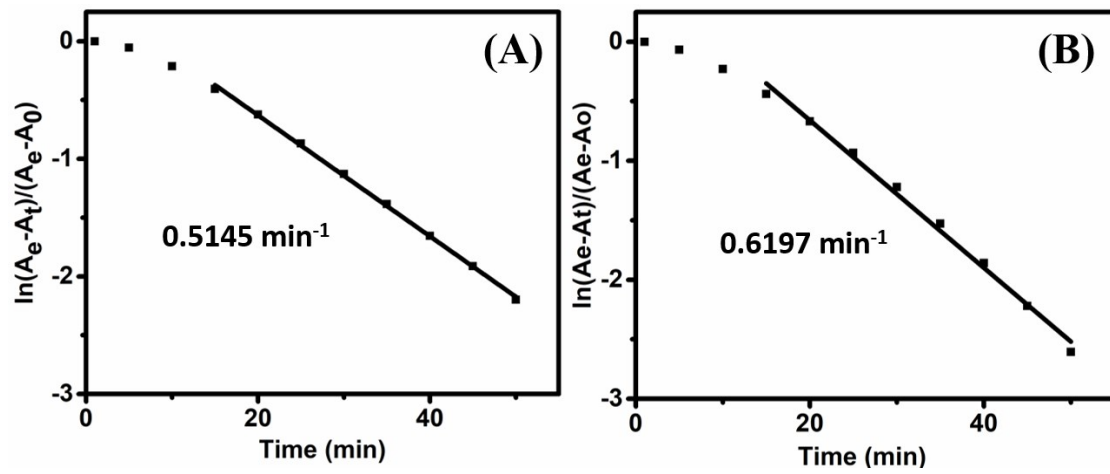

**Figure S4.** Rate constant of collagen self-assembly in the presence of L-GA (A) and D-GA (B).

5. Turbidity-time curves of BATC self-assembly in the presence of other amino acid enantiomers

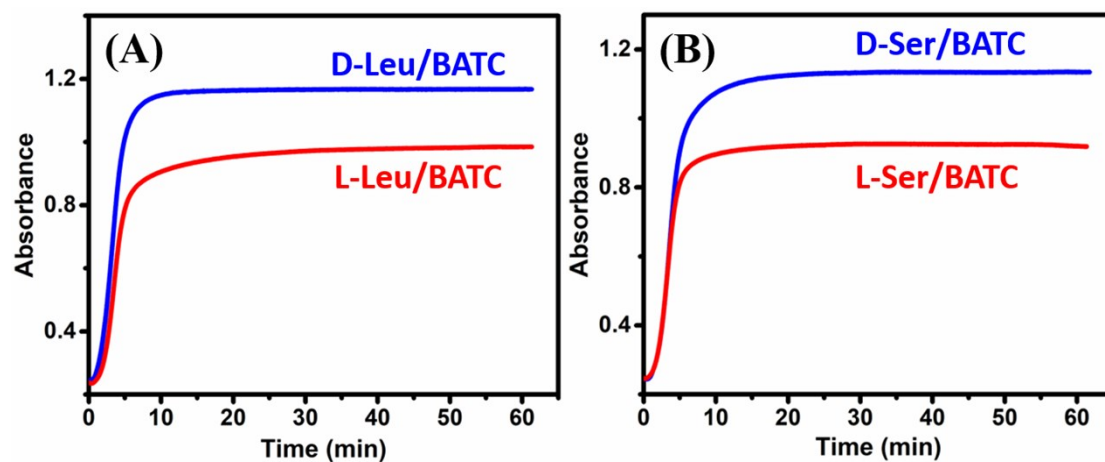

Figure S5. Turbidity-time curves of BATC self-assembly in the presence of 0.01 M L/D-Leu (A) and L/D-Ser (B).

## 6. FT-IR spectra of BATC, D-GA/BATC and L-GA/BATC

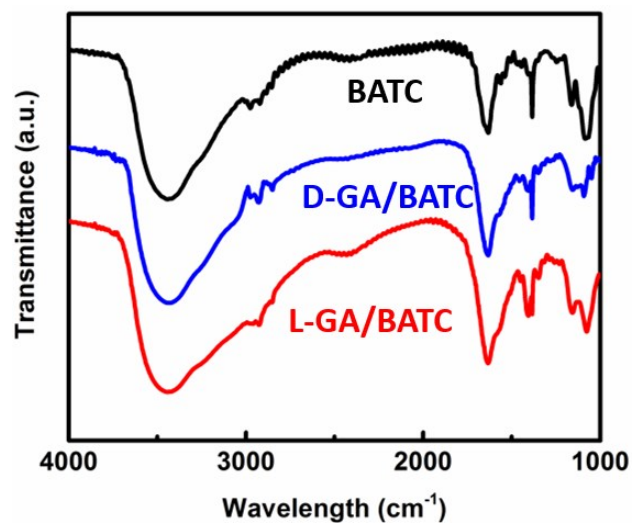

Figure S6. FT-IR spectra of BATC, D-GA/BATC and L-GA/BATC.

## 7. Viscoelastic properties of collagen gels

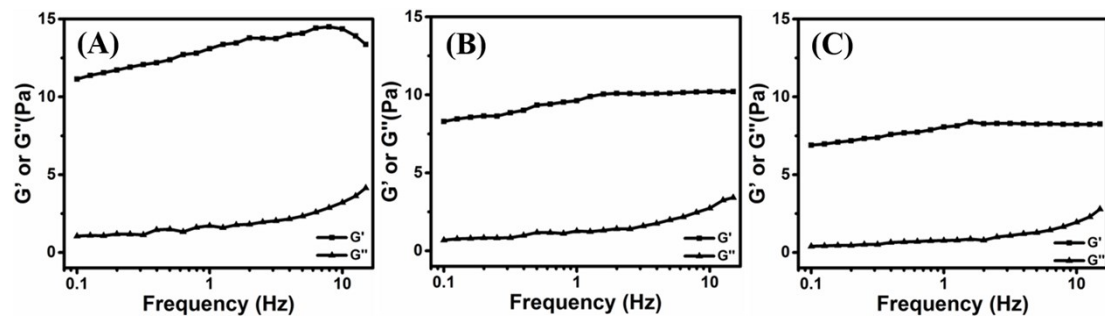

**Figure S7.** Changes of frequency dependencies in  $G'$  and  $G''$  of BATC (A), D-GA/BATC (B) and L-GA/BATC gels (C).
